# Supplementary material for: The efficacy of a blended intervention to improve physical activity and protein intake for optimal physical recovery after oncological gastrointestinal and lung cancer surgery, the Optimal Physical Recovery After Hospitalization (OPRAH) trial: study protocol for a randomized controlled multicenter trial
Source: PubMed Central journal article supplement (PMC10680183; doi:10.1186/s13063-023-07705-2), 2023-11-27
Supplement: 13063_2023_7705_MOESM3_ESM.pdf [file 13063_2023_7705_MOESM3_ESM.pdf]

### Supplementary file 3: Mapping activities to MRC Framework

|     |                                                                              |                                                                                                                                  | Described in this paper    |                            |
|-----|------------------------------------------------------------------------------|----------------------------------------------------------------------------------------------------------------------------------|----------------------------|----------------------------|
| 1   | Development of the intervention                                              |                                                                                                                                  | Methods                    | Results                    |
| 1.1 | Identifying evidence base                                                    | i. Feasibility of self-monitoring in the target population                                                                       | Leeuwerk et al., 2022 [26] | Leeuwerk et al., 2022 [26] |
|     |                                                                              | ii. Systematic review of interventions using activity trackers during and/or after an inpatient period                           | Leeuwerk et al., 2021 [21] | Leeuwerk et al., 2021 [21] |
|     |                                                                              | iii. Barriers and facilitators to the targeted behavior                                                                          | Unpublished work           | Unpublished work           |
| 1.2 | Identifying/developing theory                                                | i. Literature review and meeting with expert group to decide on theory, behavioral change techniques and intervention strategies |                            | ✓                          |
|     |                                                                              | ii. Expert meetings with stakeholders to refine content and delivery mode                                                        |                            | ✓                          |
| 1.3 | Modelling process and outcomes                                               | i. Used behavioral change wheel to identify behavioral change techniques and mode of delivery that target the desired behavior.  | ✓                          | ✓                          |
|     |                                                                              | ii. Evaluation with stakeholders to optimize practical effectiveness                                                             | ✓                          | ✓                          |
| 2   | Feasibility                                                                  |                                                                                                                                  |                            |                            |
| 2.1 | Testing the procedures for feasibility, compliance and intervention delivery | i. Testing intervention on feasibility and compliance over 6-week post discharge intervention                                    | Manuscript in preparation  | Manuscript in preparation  |
|     |                                                                              | ii. Evaluation with stakeholders to optimize practical effectiveness                                                             | Manuscript in preparation  | Manuscript in preparation  |
| 2.2 | Estimating recruitment and retention                                         | i. Test recruitment and retention from Amsterdam UMC                                                                             | Manuscript in preparation  | Manuscript in preparation  |
| 2.3 | Determining sample size RCT                                                  | i. Calculating sample size for the RCT with data from other comparable intervention trials                                       | ✓                          | ✓                          |

|     |                                |      |                                                                                                                                                                              |   |  |
|-----|--------------------------------|------|------------------------------------------------------------------------------------------------------------------------------------------------------------------------------|---|--|
| 3   | Evaluation                     |      |                                                                                                                                                                              |   |  |
| 3.1 | Assessing effectiveness        | i.   | Set up a randomized controlled trial with recovery in patient reported physical functioning as primary outcome. Control group receives usual care.                           | ✓ |  |
| 3.2 | Understanding change processes | i.   | Assessing treatment fidelity by analyzing the recorded coaching sessions by the physiotherapist and dietician.                                                               | ✓ |  |
|     |                                | ii.  | Assessing treatment adherence by recording the use of the app by the patient.                                                                                                | ✓ |  |
|     |                                | iii. | Mediation analysis to determine if the relationship between the intervention and the primary outcome can be explained by improvement of physical activity and protein intake |   |  |
| 3.3 | Assessing cost-effectiveness   | i.   | Analyzing the cost-effectiveness of the intervention.                                                                                                                        |   |  |
| 4   | Implementation                 |      |                                                                                                                                                                              |   |  |
| 4.1 | Dissemination                  | i.   | Developing implementation tools, conference presentations, peer review publications                                                                                          |   |  |
| 4.2 | Surveillance and monitoring    | i.   | If the intervention is shown to be effective, implementation could be surveilled and monitored.                                                                              |   |  |
| 4.3 | Long term follow-up            | i.   | If the intervention is shown to be effective, process and outcome data could inform additional trials                                                                        |   |  |
