# Supplementary material for: The efficacy of a blended intervention to improve physical activity and protein intake for optimal physical recovery after oncological gastrointestinal and lung cancer surgery, the Optimal Physical Recovery After Hospitalization (OPRAH) trial: study protocol for a randomized controlled multicenter trial
Source: PubMed Central journal article supplement (PMC10680183; doi:10.1186/s13063-023-07705-2), 2023-11-27
Supplement: 13063_2023_7705_MOESM4_ESM.pdf [file 13063_2023_7705_MOESM4_ESM.pdf]

## Supplementary File 4: The behavioural change wheel

| COM-B components                | What needs to change                                                                                                   | Intervention functions           | BCT's                                                                                                                                                                   | Mode of delivery                                                                                                                                                                                                                              |
|---------------------------------|------------------------------------------------------------------------------------------------------------------------|----------------------------------|-------------------------------------------------------------------------------------------------------------------------------------------------------------------------|-----------------------------------------------------------------------------------------------------------------------------------------------------------------------------------------------------------------------------------------------|
| <b>CAPABILITY</b>               |                                                                                                                        |                                  |                                                                                                                                                                         |                                                                                                                                                                                                                                               |
| <b>Physical capability</b>      | Have the physical skills to improve their level of physical activity (PA) and protein intake after surgery             | Enablement                       | Reducing barriers to increase capability                                                                                                                                | 1.2 Problem solving<br>2.2 Feedback on behavior<br>2.3 Self-monitoring of behavior<br>4.1 instructions on how to perform<br>Coaching by Healthcare Professional (HP)<br>Coaching by HP + Atris app<br>Atris app<br>Coaching by HP + Atris app |
| <b>Psychological capability</b> | Knowing how to improve their level of PA and protein intake after surgery                                              | Education<br><br>Skills training | Educate about ways to be more physically active and about protein rich products<br><br>Train cognitive skills to be able to increase the level of PA and protein intake | 2.2 Feedback on behavior<br>2.3 self-monitoring of behavior<br>4.1 instructions on how to perform<br>Coaching by HP + atris app<br>Atris app<br>Coaching by HP + Atris app                                                                    |
| <b>OPPORTUNITY</b>              |                                                                                                                        |                                  |                                                                                                                                                                         |                                                                                                                                                                                                                                               |
| <b>Physical opportunity</b>     | Creating the opportunity to be physically active and to improve their protein intake in their own physical environment | Environmental restructuring      | Provide cues and prompts to increase the level of PA                                                                                                                    | 7.1 Prompts cues<br>12.5 Adding objects to the environment<br>Atris app<br>PAM accelerometer                                                                                                                                                  |
| <b>Social opportunity</b>       | Creating access to support from a health professionals                                                                 | Enablement                       | Enable patients to contact a physiotherapist or dietician                                                                                                               | 3.1 Social support<br>Coaching by HP + Atris app                                                                                                                                                                                              |
| <b>MOTIVATION</b>               |                                                                                                                        |                                  |                                                                                                                                                                         |                                                                                                                                                                                                                                               |
| <b>Reflective motivation</b>    | Patients need to understand and belief the benefits of increasing PA and protein intake on their recovery              | Education, enablement            | Inform about the benefits of increasing their level of PA and protein intake                                                                                            | 1.7 review outcome goals<br>2.2 Feedback on behavior<br>Coaching by HP + Atris app<br>Coaching by HP + Atris app<br>Coaching by HP + Atris app                                                                                                |

|                             |                                                                                                    |                              |                                                                                                     |                                                                                                                                                                                                           |                                                                                                                                                                        |
|-----------------------------|----------------------------------------------------------------------------------------------------|------------------------------|-----------------------------------------------------------------------------------------------------|-----------------------------------------------------------------------------------------------------------------------------------------------------------------------------------------------------------|------------------------------------------------------------------------------------------------------------------------------------------------------------------------|
|                             |                                                                                                    |                              | Educate to create more positive beliefs about increasing PA and protein intake                      | 5.1 Information about health consequences<br>2.3 self-monitoring of behavior                                                                                                                              | Atris app                                                                                                                                                              |
|                             | Patients need to have confidence in their ability to increase their level of PA and protein intake | Training, enablement         | Train to set realistic goals.                                                                       | 1.1 Goal setting (behavior)                                                                                                                                                                               | Coaching by HP + Atris app                                                                                                                                             |
|                             |                                                                                                    | Persuasion, incentivisation  | Let the patient feel positive about increasing their level of PA and reaching their protein targets | 1.2 Problem Solving<br>1.4 Action planning<br>1.5 review behavioral goals<br>2.3 Self-monitoring of behaviour<br>3.1 Social support<br>8.7 Graded Tasks<br>10.3 non-specific reward<br>10.4 Social reward | Coaching by HP<br>Coaching by HP + Atris app<br>Coaching by HP<br>Atris app<br>Coaching by HP + Atris app<br>Coaching by HP + Atris app<br>Atris app<br>Coaching by HP |
| <b>Automatic motivation</b> | Create established routines and habits to increase the level of PA and protein intake              | Incentivisation, persuasion, | Reward patients if they continue increasing their level of PA and reach their protein targets       | 2.2 Feedback on behavior<br>2.3 self-monitoring on behavior<br>10.3 non-specific reward<br>10.4 Social reward                                                                                             | Coaching by HP + Atris app<br>Atris app<br>Atris app<br>Coaching by HP                                                                                                 |
